# Supplementary material for: The Multiple States of Environmental DNA and What Is Known about Their Persistence in Aquatic Environments
Source: Environ Sci Technol. 2022 Apr 18;56(9):5322–33. doi: 10.1021/acs.est.1c07638 (PMC9069692; doi:10.1021/acs.est.1c07638)
Supplement: Supplementary file 4 — es1c07638_si_004.xlsx [file es1c07638_si_004.xlsx]

## Sheet: Fish temperature
Organism	group	Ecosystem	Source	Region	ampliconlength(bp)	Time point	Maxtime(h)	Slope	Slope/h	half-life	k (hours)	1/T [K]	-ln (k)	Temperature(℃)	pH	Reference	Year	Studynumber	Temperaturegroup(℃)	lengthgroup(bp)	Experimentstype	DNAtype	FullReference
Cyprinus carpio	fish	Freshwater	Well	CytB	146	6	72	0.105	0.105	7	0.105	0.00335402	-2.25379	25	7.5	Barnes et al.	2014	3	21-	101-200	tank	spike	Barnes, M. A., Turner, C. R., Jerde, C. L., Renshaw, M. A., Chadderton, W. L., & Lodge, D. M. (2014). Environmental Conditions Influence eDNA Persistence in Aquatic Systems. Environmental Science & Technology, 48(3), 1819–1827. doi: 10.1021/es404734p
Carassius auratus	fish	Freshwater	Tap	COI	96	7	672	0.237	0.237	3	0.231049	0.00341122	-1.46513	20		Bylemans et al.	2018	16	11-20	0-100	tank	organism	Bylemans, J., Furlan, E. M., Gleeson, D. M., Hardy, C. M., & Duncan, R. P. (2018). Does size matter? An experimental evaluation of the relative abundance and decay rates of aquatic eDNA. Environmental Science & Technology, 52(11), 6408–6416. doi: 10.1021/acs.est.8b01071
Carassius auratus	fish	Freshwater	Tap	COI	96	7	672	0.158	0.158	4	0.173287	0.00341122	-1.75281	20		Bylemans et al.	2018	16	11-20	0-100	tank	organism	Bylemans, J., Furlan, E. M., Gleeson, D. M., Hardy, C. M., & Duncan, R. P. (2018). Does size matter? An experimental evaluation of the relative abundance and decay rates of aquatic eDNA. Environmental Science & Technology, 52(11), 6408–6416. doi: 10.1021/acs.est.8b01071
Carassius auratus	fish	Freshwater	Tap	COI	96	7	672	0.218	0.218	3	0.231049	0.00341122	-1.46513	20		Bylemans et al.	2018	16	11-20	0-100	tank	organism	Bylemans, J., Furlan, E. M., Gleeson, D. M., Hardy, C. M., & Duncan, R. P. (2018). Does size matter? An experimental evaluation of the relative abundance and decay rates of aquatic eDNA. Environmental Science & Technology, 52(11), 6408–6416. doi: 10.1021/acs.est.8b01071
Carassius auratus	fish	Freshwater	Tap	COI	285	7	672	0.223	0.223	3	0.231049	0.00341122	-1.46513	20		Bylemans et al.	2018	16	11-20	201-	tank	organism	Bylemans, J., Furlan, E. M., Gleeson, D. M., Hardy, C. M., & Duncan, R. P. (2018). Does size matter? An experimental evaluation of the relative abundance and decay rates of aquatic eDNA. Environmental Science & Technology, 52(11), 6408–6416. doi: 10.1021/acs.est.8b01071
Carassius auratus	fish	Freshwater	Tap	COI	285	7	672	0.134	0.134	5	0.138629	0.00341122	-1.97595	20		Bylemans et al.	2018	16	11-20	201-	tank	organism	Bylemans, J., Furlan, E. M., Gleeson, D. M., Hardy, C. M., & Duncan, R. P. (2018). Does size matter? An experimental evaluation of the relative abundance and decay rates of aquatic eDNA. Environmental Science & Technology, 52(11), 6408–6416. doi: 10.1021/acs.est.8b01071
Carassius auratus	fish	Freshwater	Tap	COI	285	7	672	0.22	0.22	3	0.231049	0.00341122	-1.46513	20		Bylemans et al.	2018	16	11-20	201-	tank	organism	Bylemans, J., Furlan, E. M., Gleeson, D. M., Hardy, C. M., & Duncan, R. P. (2018). Does size matter? An experimental evaluation of the relative abundance and decay rates of aquatic eDNA. Environmental Science & Technology, 52(11), 6408–6416. doi: 10.1021/acs.est.8b01071
Carassius auratus	fish	Freshwater	Tap	COI	515	7	672	0.364	0.364	2	0.346574	0.00341122	-1.05966	20		Bylemans et al.	2018	16	11-20	201-	tank	organism	Bylemans, J., Furlan, E. M., Gleeson, D. M., Hardy, C. M., & Duncan, R. P. (2018). Does size matter? An experimental evaluation of the relative abundance and decay rates of aquatic eDNA. Environmental Science & Technology, 52(11), 6408–6416. doi: 10.1021/acs.est.8b01071
Carassius auratus	fish	Freshwater	Tap	COI	515	7	672	0.348	0.348	2	0.346574	0.00341122	-1.05966	20		Bylemans et al.	2018	16	11-20	201-	tank	organism	Bylemans, J., Furlan, E. M., Gleeson, D. M., Hardy, C. M., & Duncan, R. P. (2018). Does size matter? An experimental evaluation of the relative abundance and decay rates of aquatic eDNA. Environmental Science & Technology, 52(11), 6408–6416. doi: 10.1021/acs.est.8b01071
Carassius auratus	fish	Freshwater	Tap	COI	515	7	672	0.476	0.476	1	0.693147	0.00341122	-0.366513	20		Bylemans et al.	2018	16	11-20	201-	tank	organism	Bylemans, J., Furlan, E. M., Gleeson, D. M., Hardy, C. M., & Duncan, R. P. (2018). Does size matter? An experimental evaluation of the relative abundance and decay rates of aquatic eDNA. Environmental Science & Technology, 52(11), 6408–6416. doi: 10.1021/acs.est.8b01071
Carassius auratus	fish	Freshwater	Tap	ITS	95	7	672	0.1193	0.1193	6	0.115525	0.00341122	-2.15827	20		Bylemans et al.	2018	16	11-20	0-100	tank	organism	Bylemans, J., Furlan, E. M., Gleeson, D. M., Hardy, C. M., & Duncan, R. P. (2018). Does size matter? An experimental evaluation of the relative abundance and decay rates of aquatic eDNA. Environmental Science & Technology, 52(11), 6408–6416. doi: 10.1021/acs.est.8b01071
Carassius auratus	fish	Freshwater	Tap	ITS	95	7	672	0.166	0.166	4	0.173287	0.00341122	-1.75281	20		Bylemans et al.	2018	16	11-20	0-100	tank	organism	Bylemans, J., Furlan, E. M., Gleeson, D. M., Hardy, C. M., & Duncan, R. P. (2018). Does size matter? An experimental evaluation of the relative abundance and decay rates of aquatic eDNA. Environmental Science & Technology, 52(11), 6408–6416. doi: 10.1021/acs.est.8b01071
Carassius auratus	fish	Freshwater	Tap	ITS	95	7	672	0.23	0.23	3	0.231049	0.00341122	-1.46513	20		Bylemans et al.	2018	16	11-20	0-100	tank	organism	Bylemans, J., Furlan, E. M., Gleeson, D. M., Hardy, C. M., & Duncan, R. P. (2018). Does size matter? An experimental evaluation of the relative abundance and decay rates of aquatic eDNA. Environmental Science & Technology, 52(11), 6408–6416. doi: 10.1021/acs.est.8b01071
Cyprinus carpio	fish	Freshwater	Lake	CytB	149	14	672	2.39	0.0995833	6.96047	0.099021	0.00324517	-2.31242	35		Eichmiller et al.	2016	5	21-	101-200	tank	organism	Eichmiller, J. J., Best, S. E., & Sorensen, P. W. (2016). Effects of Temperature and Trophic State on Degradation of Environmental DNA in Lake Water. Environmental Science & Technology, 50(4), 1859–1867. doi: 10.1021/acs.est.5b05672
Cyprinus carpio	fish	Freshwater	Lake	CytB	149	14	672	2.42	0.100833	6.87419	0.099021	0.00335402	-2.31242	25		Eichmiller et al.	2016	5	21-	101-200	tank	organism	Eichmiller, J. J., Best, S. E., & Sorensen, P. W. (2016). Effects of Temperature and Trophic State on Degradation of Environmental DNA in Lake Water. Environmental Science & Technology, 50(4), 1859–1867. doi: 10.1021/acs.est.5b05672
Cyprinus carpio	fish	Freshwater	Lake	CytB	149	14	672	1.87	0.0779167	8.89601	0.0770164	0.00347041	-2.56374	15		Eichmiller et al.	2016	5	11-20	101-200	tank	organism	Eichmiller, J. J., Best, S. E., & Sorensen, P. W. (2016). Effects of Temperature and Trophic State on Degradation of Environmental DNA in Lake Water. Environmental Science & Technology, 50(4), 1859–1867. doi: 10.1021/acs.est.5b05672
Cyprinus carpio	fish	Freshwater	well water	CytB	149	14	672	0.83	0.0345833	20.0428	0.0346574	0.00347041	-3.36225	15		Eichmiller et al.	2016	5	11-20	101-200	tank	organism	Eichmiller, J. J., Best, S. E., & Sorensen, P. W. (2016). Effects of Temperature and Trophic State on Degradation of Environmental DNA in Lake Water. Environmental Science & Technology, 50(4), 1859–1867. doi: 10.1021/acs.est.5b05672
Cyprinus carpio	fish	Freshwater	Lake dystrophic	CytB	149	14	672	0.66	0.0275	25.2054	0.0277259	0.00347041	-3.58539	15		Eichmiller et al.	2016	5	11-20	101-200	tank	organism	Eichmiller, J. J., Best, S. E., & Sorensen, P. W. (2016). Effects of Temperature and Trophic State on Degradation of Environmental DNA in Lake Water. Environmental Science & Technology, 50(4), 1859–1867. doi: 10.1021/acs.est.5b05672
Cyprinus carpio	fish	Freshwater	Lake eutrophic	CytB	149	14	672	1.69	0.0704167	9.84351	0.0693147	0.00347041	-2.6691	15		Eichmiller et al.	2016	5	11-20	101-200	tank	organism	Eichmiller, J. J., Best, S. E., & Sorensen, P. W. (2016). Effects of Temperature and Trophic State on Degradation of Environmental DNA in Lake Water. Environmental Science & Technology, 50(4), 1859–1867. doi: 10.1021/acs.est.5b05672
Cyprinus carpio	fish	Freshwater	Lake oligotrophic	CytB	149	14	672	2.34	0.0975	7.1092	0.099021	0.00347041	-2.31242	15		Eichmiller et al.	2016	5	11-20	101-200	tank	organism	Eichmiller, J. J., Best, S. E., & Sorensen, P. W. (2016). Effects of Temperature and Trophic State on Degradation of Environmental DNA in Lake Water. Environmental Science & Technology, 50(4), 1859–1867. doi: 10.1021/acs.est.5b05672
Cyprinus carpio	fish	Freshwater	Lake	CytB	149	14	672	0.35	0.0145833	47.5301	0.0147478	0.00359518	-4.21666	5		Eichmiller et al.	2016	5	0-10	101-200	tank	organism	Eichmiller, J. J., Best, S. E., & Sorensen, P. W. (2016). Effects of Temperature and Trophic State on Degradation of Environmental DNA in Lake Water. Environmental Science & Technology, 50(4), 1859–1867. doi: 10.1021/acs.est.5b05672
Anguilla japonica	fish	Freshwater	Tap	D-loop	138	7	144	0.04	0.04	17	0.0407734	0.0032987	-3.19973	30		Kasai et al.	2020	26	21-	101-200	tank	organism	Kasai, A., Takada, S., Yamazaki, A., Masuda, R., & Yamanaka, H. (2020). The effect of temperature on environmental DNA degradation of Japanese eel. Fisheries Science. doi: 10.1007/s12562-020-01409-1
Anguilla japonica	fish	Freshwater	Tap	D-loop	138	7	144	0.023	0.023	30	0.0231049	0.00335402	-3.76771	25		Kasai et al.	2020	26	21-	101-200	tank	organism	Kasai, A., Takada, S., Yamazaki, A., Masuda, R., & Yamanaka, H. (2020). The effect of temperature on environmental DNA degradation of Japanese eel. Fisheries Science. doi: 10.1007/s12562-020-01409-1
Anguilla japonica	fish	Freshwater	Tap	D-loop	138	7	144	0.017	0.017	41	0.016906	0.00341122	-4.08008	20		Kasai et al.	2020	26	11-20	101-200	tank	organism	Kasai, A., Takada, S., Yamazaki, A., Masuda, R., & Yamanaka, H. (2020). The effect of temperature on environmental DNA degradation of Japanese eel. Fisheries Science. doi: 10.1007/s12562-020-01409-1
Anguilla japonica	fish	Freshwater	Tap	D-loop	138	7	144	0.018	0.018	39	0.017773	0.00347041	-4.03007	15		Kasai et al.	2020	26	11-20	101-200	tank	organism	Kasai, A., Takada, S., Yamazaki, A., Masuda, R., & Yamanaka, H. (2020). The effect of temperature on environmental DNA degradation of Japanese eel. Fisheries Science. doi: 10.1007/s12562-020-01409-1
Anguilla japonica	fish	Freshwater	Tap	D-loop	138	7	144	0.022	0.022	32	0.0216608	0.0035317	-3.83225	10		Kasai et al.	2020	26	0-10	101-200	tank	organism	Kasai, A., Takada, S., Yamazaki, A., Masuda, R., & Yamanaka, H. (2020). The effect of temperature on environmental DNA degradation of Japanese eel. Fisheries Science. doi: 10.1007/s12562-020-01409-1
Hypophthalmichthys nobilis	fish	Freshwater	Deionized	D-loop	190	8	336	0.39	0.01625	42.6552	0.0161197	0.0032987	-4.12771	30		Lance et al.	2017	13	21-	101-200	tank	spike	Lance, R., Klymus, K., Richter, C., Guan, X., Farrington, H., Carr, M., … Baerwaldt, K. (2017). Experimental observations on the decay of environmental DNA from bighead and silver carps. Management of Biological Invasions, 8(3), 343–359. doi: 10.3391/mbi.2017.8.3.08
Hypophthalmichthys nobilis	fish	Freshwater	Deionized	D-loop	190	8	336	0.21	0.00875	79.2168	0.00877401	0.00341122	-4.73596	20		Lance et al.	2017	13	11-20	101-200	tank	spike	Lance, R., Klymus, K., Richter, C., Guan, X., Farrington, H., Carr, M., … Baerwaldt, K. (2017). Experimental observations on the decay of environmental DNA from bighead and silver carps. Management of Biological Invasions, 8(3), 343–359. doi: 10.3391/mbi.2017.8.3.08
Hypophthalmichthys nobilis	fish	Freshwater	Deionized	D-loop	190	8	336	0.17	0.00708333	97.8561	0.00707293	0.00341122	-4.95148	20	6.5	Lance et al.	2017	13	11-20	101-200	tank	spike	Lance, R., Klymus, K., Richter, C., Guan, X., Farrington, H., Carr, M., … Baerwaldt, K. (2017). Experimental observations on the decay of environmental DNA from bighead and silver carps. Management of Biological Invasions, 8(3), 343–359. doi: 10.3391/mbi.2017.8.3.08
Hypophthalmichthys nobilis	fish	Freshwater	Deionized	D-loop	190	8	336	0.23	0.00958333	72.3284	0.00962704	0.00341122	-4.64318	20	7	Lance et al.	2017	13	11-20	101-200	tank	spike	Lance, R., Klymus, K., Richter, C., Guan, X., Farrington, H., Carr, M., … Baerwaldt, K. (2017). Experimental observations on the decay of environmental DNA from bighead and silver carps. Management of Biological Invasions, 8(3), 343–359. doi: 10.3391/mbi.2017.8.3.08
Hypophthalmichthys nobilis	fish	Freshwater	Deionized	D-loop	190	8	336	0.23	0.00958333	72.3284	0.00962704	0.00341122	-4.64318	20	7.5	Lance et al.	2017	13	11-20	101-200	tank	spike	Lance, R., Klymus, K., Richter, C., Guan, X., Farrington, H., Carr, M., … Baerwaldt, K. (2017). Experimental observations on the decay of environmental DNA from bighead and silver carps. Management of Biological Invasions, 8(3), 343–359. doi: 10.3391/mbi.2017.8.3.08
Hypophthalmichthys nobilis	fish	Freshwater	Deionized	D-loop	190	8	336	0.27	0.01125	61.6131	0.0113631	0.00341122	-4.47739	20	8	Lance et al.	2017	13	11-20	101-200	tank	spike	Lance, R., Klymus, K., Richter, C., Guan, X., Farrington, H., Carr, M., … Baerwaldt, K. (2017). Experimental observations on the decay of environmental DNA from bighead and silver carps. Management of Biological Invasions, 8(3), 343–359. doi: 10.3391/mbi.2017.8.3.08
Hypophthalmichthys nobilis	fish	Freshwater	Deionized	D-loop	190	8	336	0.083	0.00345833	200.428	0.00350074	0.00350693	-5.65478	12		Lance et al.	2017	13	0-10	101-200	tank	spike	Lance, R., Klymus, K., Richter, C., Guan, X., Farrington, H., Carr, M., … Baerwaldt, K. (2017). Experimental observations on the decay of environmental DNA from bighead and silver carps. Management of Biological Invasions, 8(3), 343–359. doi: 10.3391/mbi.2017.8.3.08
Hypophthalmichthys nobilis	fish	Freshwater	Deionized	D-loop	190	8	336	0.071	0.00295833	234.303	0.00300064	0.00360815	-5.80893	4		Lance et al.	2017	13	0-10	101-200	tank	spike	Lance, R., Klymus, K., Richter, C., Guan, X., Farrington, H., Carr, M., … Baerwaldt, K. (2017). Experimental observations on the decay of environmental DNA from bighead and silver carps. Management of Biological Invasions, 8(3), 343–359. doi: 10.3391/mbi.2017.8.3.08
Lepomis macrochirus	fish	Freshwater	Tap	CytB	100	8	96	0.116	0.116	6	0.115525	0.00341122	-2.15827	20		Maruyama et al	2014	2	11-20	0-100	tank	organism	Maruyama, A., Nakamura, K., Yamanaka, H., Kondoh, M., & Minamoto, T. (2014). The release rate of environmental DNA from juvenile and adult fish. PloS One, 9(12), e114639. doi: https://doi.org/10.1371/journal.pone.0114639
Lepomis macrochirus	fish	Freshwater	Tap	CytB	100	8	96	0.132	0.132	5	0.138629	0.00341122	-1.97595	20		Maruyama et al	2014	2	11-20	0-100	tank	organism	Maruyama, A., Nakamura, K., Yamanaka, H., Kondoh, M., & Minamoto, T. (2014). The release rate of environmental DNA from juvenile and adult fish. PloS One, 9(12), e114639. doi: https://doi.org/10.1371/journal.pone.0114639
Lepomis macrochirus	fish	Freshwater	Tap	CytB	100	8	96	0.159	0.159	4	0.173287	0.00341122	-1.75281	20		Maruyama et al	2014	2	11-20	0-100	tank	organism	Maruyama, A., Nakamura, K., Yamanaka, H., Kondoh, M., & Minamoto, T. (2014). The release rate of environmental DNA from juvenile and adult fish. PloS One, 9(12), e114639. doi: https://doi.org/10.1371/journal.pone.0114639
Lepomis macrochirus	fish	Freshwater	Tap	CytB	100	8	96	0.051	0.051	14	0.0495105	0.00341122	-3.00557	20		Maruyama et al	2014	2	11-20	0-100	tank	organism	Maruyama, A., Nakamura, K., Yamanaka, H., Kondoh, M., & Minamoto, T. (2014). The release rate of environmental DNA from juvenile and adult fish. PloS One, 9(12), e114639. doi: https://doi.org/10.1371/journal.pone.0114639
Lepomis macrochirus	fish	Freshwater	Tap	CytB	100	8	96	0.06	0.06	12	0.0577623	0.00341122	-2.85142	20		Maruyama et al	2014	2	11-20	0-100	tank	organism	Maruyama, A., Nakamura, K., Yamanaka, H., Kondoh, M., & Minamoto, T. (2014). The release rate of environmental DNA from juvenile and adult fish. PloS One, 9(12), e114639. doi: https://doi.org/10.1371/journal.pone.0114639
Neogobius melanostomus	fish	Freshwater	Lake	COI	147	8	312	0.058	0.058	12	0.0577623	0.0034229	-2.85142	19		Nevers et al.	2018	17	11-20	101-200	tank	organism	Nevers, M. B., Byappanahalli, M. N., Morris, C. C., Shively, D., Przybyla-Kelly, K., Spoljaric, A. M., … Roseman, E. F. (2018). Environmental DNA (eDNA): A tool for quantifying the abundant but elusive round goby (Neogobius melanostomus). PloS One, 13(1), e0191720. doi: https://doi.org/10.1371/journal. pone.0191720
Neogobius melanostomus	fish	Freshwater	Lake	COI	147	10	360	0.043	0.043	16	0.0433217	0.00350693	-3.1391	12		Nevers et al.	2018	17	11-20	101-200	tank	organism	Nevers, M. B., Byappanahalli, M. N., Morris, C. C., Shively, D., Przybyla-Kelly, K., Spoljaric, A. M., … Roseman, E. F. (2018). Environmental DNA (eDNA): A tool for quantifying the abundant but elusive round goby (Neogobius melanostomus). PloS One, 13(1), e0191720. doi: https://doi.org/10.1371/journal. pone.0191720
Cyprinus carpio	fish	Freshwater	Lake	CytB	149	7	48	0.086	0.086	8	0.0866434	0.00338238	-2.44595	22.5		Nukazawa et al.	2018	18	21-	101-200	tank	spike	Nukazawa, K., Hamasuna, Y., & Suzuki, Y. (2018). Simulating the Advection and Degradation of the Environmental DNA of Common Carp along a River. Environmental Science & Technology, 52(18), 10562–10570. doi: 10.1021/acs.est.8b02293
Cyprinus carpio	fish	Freshwater	Lake	CytB	149	7	48	0.017	0.017	41	0.016906	0.0034825	-4.08008	14		Nukazawa et al.	2018	18	21-	101-200	tank	spike	Nukazawa, K., Hamasuna, Y., & Suzuki, Y. (2018). Simulating the Advection and Degradation of the Environmental DNA of Common Carp along a River. Environmental Science & Technology, 52(18), 10562–10570. doi: 10.1021/acs.est.8b02293
Oncorhynchus kisutch	fish	Freshwater	Pond	COI	120	12	168				0.171	0.00332392	-1.76609	27.7	6.2	Saito and Doi	2021				tank	spike	Saito, T., & Doi, H. (2021). Degradation modeling of water environmental DNA: Experiments on multiple DNA sources in pond and seawater. Environmental DNA, 3(4), 850–860. doi: 10.1002/edn3.192
Oncorhynchus kisutch	fish	Freshwater	Pond	COI	120	12	168				0.082	0.00332392	-2.50104	27.7	6.2	Saito and Doi	2021				tank	spike	Saito, T., & Doi, H. (2021). Degradation modeling of water environmental DNA: Experiments on multiple DNA sources in pond and seawater. Environmental DNA, 3(4), 850–860. doi: 10.1002/edn3.192
Cyprinus carpio	fish	Freshwater	Pond	COI	120	12	168				0.109	0.00332392	-2.21641	27.7	6.2	Saito and Doi	2021				tank	organism	Saito, T., & Doi, H. (2021). Degradation modeling of water environmental DNA: Experiments on multiple DNA sources in pond and seawater. Environmental DNA, 3(4), 850–860. doi: 10.1002/edn3.192
Cyprinus carpio	fish	Freshwater	Pond	COI	120	12	168				0.022	0.00332392	-3.81671	27.7	6.2	Saito and Doi	2021				tank	organism	Saito, T., & Doi, H. (2021). Degradation modeling of water environmental DNA: Experiments on multiple DNA sources in pond and seawater. Environmental DNA, 3(4), 850–860. doi: 10.1002/edn3.192
Plecoglossus altivelis	fish	Freshwater	River	CytB	131	7	48	0.091	0.091	7.617	0.0866434	0.0032987	-2.44595	30	8	Tsuji et al.	2017	11	21-	101-200	tank	organism	Tsuji, S., Ushio, M., Sakurai, S., Minamoto, T., & Yamanaka, H. (2017). Water temperature-dependent degradation of environmental DNA and its relation to bacterial abundance. PloS One, 12(4), e0176608.
Cyprinus carpio	fish	Freshwater	River	CytB	78	7	48	0.079	0.079	8.77401	0.0770164	0.0032987	-2.56374	30	8	Tsuji et al.	2017	11	21-	0-100	tank	organism	Tsuji, S., Ushio, M., Sakurai, S., Minamoto, T., & Yamanaka, H. (2017). Water temperature-dependent degradation of environmental DNA and its relation to bacterial abundance. PloS One, 12(4), e0176608.
Plecoglossus altivelis	fish	Freshwater	River	CytB	131	7	48	0.058	0.058	11.9508	0.0577623	0.00341122	-2.85142	20	8	Tsuji et al.	2017	11	11-20	101-200	tank	organism	Tsuji, S., Ushio, M., Sakurai, S., Minamoto, T., & Yamanaka, H. (2017). Water temperature-dependent degradation of environmental DNA and its relation to bacterial abundance. PloS One, 12(4), e0176608.
Cyprinus carpio	fish	Freshwater	River	CytB	78	7	48	0.045	0.045	15.4033	0.0462098	0.00341122	-3.07456	20	8	Tsuji et al.	2017	11	11-20	0-100	tank	organism	Tsuji, S., Ushio, M., Sakurai, S., Minamoto, T., & Yamanaka, H. (2017). Water temperature-dependent degradation of environmental DNA and its relation to bacterial abundance. PloS One, 12(4), e0176608.
Plecoglossus altivelis	fish	Freshwater	River	CytB	131	7	48	0.024	0.024	28.8811	0.0239016	0.0035317	-3.73381	10	8	Tsuji et al.	2017	11	0-10	101-200	tank	organism	Tsuji, S., Ushio, M., Sakurai, S., Minamoto, T., & Yamanaka, H. (2017). Water temperature-dependent degradation of environmental DNA and its relation to bacterial abundance. PloS One, 12(4), e0176608.
Cyprinus carpio	fish	Freshwater	River	CytB	78	7	48	0.027	0.027	25.6721	0.0266595	0.0035317	-3.62461	10	8	Tsuji et al.	2017	11	0-10	0-100	tank	organism	Tsuji, S., Ushio, M., Sakurai, S., Minamoto, T., & Yamanaka, H. (2017). Water temperature-dependent degradation of environmental DNA and its relation to bacterial abundance. PloS One, 12(4), e0176608.
Oncorhynchus kisutch	fish	Marine	Sea	COI	120	12	168				0.181	0.00334504	-1.70926	25.8	6.7	Saito and Doi	2021				tank	spike	Saito, T., & Doi, H. (2021). Degradation modeling of water environmental DNA: Experiments on multiple DNA sources in pond and seawater. Environmental DNA, 3(4), 850–860. doi: 10.1002/edn3.192
Oncorhynchus kisutch	fish	Marine	Sea	COI	120	12	168				0.151	0.00334504	-1.89048	25.8	6.7	Saito and Doi	2021				tank	spike	Saito, T., & Doi, H. (2021). Degradation modeling of water environmental DNA: Experiments on multiple DNA sources in pond and seawater. Environmental DNA, 3(4), 850–860. doi: 10.1002/edn3.192
Trachurus japonicus	fish	Marine	Sea	COI	120	12	168				0.112	0.00334504	-2.18926	25.8	6.7	Saito and Doi	2021				tank	organism	Saito, T., & Doi, H. (2021). Degradation modeling of water environmental DNA: Experiments on multiple DNA sources in pond and seawater. Environmental DNA, 3(4), 850–860. doi: 10.1002/edn3.192
Gasterosteus aculeatus	fish	Marine	Marine	CytB	101	19	360	0.701	0.029	24	0.0288811	0.00347041	-3.54457	15		Thomsen et al.	2012	1	11-20	101-200	tank	spike	Thomsen, P. F., Kielgast, J., Iversen, L. L., Møller, P. R., Rasmussen, M., & Willerslev, E. (2012). Detection of a Diverse Marine Fish Fauna Using Environmental DNA from Seawater Samples. PLoS ONE, 7(8), e41732. doi: 10.1371/journal.pone.0041732
Platichthys flesus	fish	Marine	Marine	CytB	104	19	360	0.322	0.013	53	0.0130782	0.00347041	-4.3368	15		Thomsen et al.	2012	1	11-20	101-200	tank	spike	Thomsen, P. F., Kielgast, J., Iversen, L. L., Møller, P. R., Rasmussen, M., & Willerslev, E. (2012). Detection of a Diverse Marine Fish Fauna Using Environmental DNA from Seawater Samples. PLoS ONE, 7(8), e41732. doi: 10.1371/journal.pone.0041732
Engraulis mordax	fish	Marine	Marine	D-loop	133	23	220	0.101	0.101	7	0.099021	0.00338811	-2.31242	22		Sassoubre et al.	2016	6	21-	101-200	tank	organism	Sassoubre, L. M., Yamahara, K. M., Gardner, L. D., Block, B. A., & Boehm, A. B. (2016). Quantification of Environmental DNA (eDNA) Shedding and Decay Rates for Three Marine Fish. Environmental Science & Technology, 50(19), 10456–10464. doi: 10.1021/acs.est.6b03114
Sardinops sagax	fish	Marine	Marine	D-loop	107	25	170	0.068	0.068	10	0.0693147	0.0034229	-2.6691	19		Sassoubre et al.	2016	6	11-20	101-200	tank	organism	Sassoubre, L. M., Yamahara, K. M., Gardner, L. D., Block, B. A., & Boehm, A. B. (2016). Quantification of Environmental DNA (eDNA) Shedding and Decay Rates for Three Marine Fish. Environmental Science & Technology, 50(19), 10456–10464. doi: 10.1021/acs.est.6b03114
Scomber japonicus	fish	Marine	Marine	COI	107	25	165	0.07	0.07	10	0.0693147	0.0034229	-2.6691	19		Sassoubre et al.	2016	6	11-20	101-200	tank	organism	Sassoubre, L. M., Yamahara, K. M., Gardner, L. D., Block, B. A., & Boehm, A. B. (2016). Quantification of Environmental DNA (eDNA) Shedding and Decay Rates for Three Marine Fish. Environmental Science & Technology, 50(19), 10456–10464. doi: 10.1021/acs.est.6b03114
Scomber japonicus	fish	Marine	Marine	COI	107	8	87	0.039	0.039	18	0.0385082	0.00344649	-3.25688	17		Andruszkiewicz et al.	2017	7	11-20	101-200	fieeld	organism	Andruszkiewicz, E. A., Sassoubre, L. M., & Boehm, A. B. (2017). Persistence of marine fish environmental DNA and the influence of sunlight. PLOS ONE, 12(9), e0185043. doi: 10.1371/journal.pone.0185043
Scomber japonicus	fish	Marine	Marine	COI	107	8	87	0.038	0.038	18	0.0385082	0.00344649	-3.25688	17		Andruszkiewicz et al.	2017	7	11-20	101-200	fieeld	organism	Andruszkiewicz, E. A., Sassoubre, L. M., & Boehm, A. B. (2017). Persistence of marine fish environmental DNA and the influence of sunlight. PLOS ONE, 12(9), e0185043. doi: 10.1371/journal.pone.0185043
Zearaja maugeana	fish	Marine	Marine	ND4	331	4	72	0.02	0.0008	866	0.000800401	0.00360815	-7.1304	4		Weltz et al.	2017	8	0-10	201-	tank	organism	Weltz, K., Lyle, J. M., Ovenden, J., Morgan, J. A., Moreno, D. A., & Semmens, J. M. (2017). Application of environmental DNA to detect an endangered marine skate species in the wild. PloS One, 12(6), e0178124.
Zearaja maugeana	fish	Marine	Marine	ND4	331	4	72	0.011	0.0005	1386	0.000500106	0.00360815	-7.60069	4		Weltz et al.	2017	8	0-10	201-	tank	organism	Weltz, K., Lyle, J. M., Ovenden, J., Morgan, J. A., Moreno, D. A., & Semmens, J. M. (2017). Application of environmental DNA to detect an endangered marine skate species in the wild. PloS One, 12(6), e0178124.
Trachurus japonicus	fish	Marine	Marine	CytB	719	22	48	0.09	0.09	8	0.0866434		-2.44595	NA		Jo et al.	2017	10	NA	201-	tank	organism	Jo, T., Murakami, H., Masuda, R., Sakata, M. K., Yamamoto, S., & Minamoto, T. (2017). Rapid degradation of longer DNA fragments enables the improved estimation of distribution and biomass using environmental DNA. Molecular Ecology Resources. doi: 10.1111/1755-0998.12685
Lipophrys pholis	fish	Marine	Marine	COI	132	6	192	0.015	0.015	46	0.0150684	0.00347041	-4.19515	15	9	Collins et al.	2018	14	11-20	101-200	tank	organism	Collins, R. A., Wangensteen, O. S., O’Gorman, E. J., Mariani, S., Sims, D. W., & Genner, M. J. (2018). Persistence of environmental DNA in marine systems. Communications Biology, 1(1). doi: 10.1038/s42003-018-0192-6
Lipophrys pholis	fish	Marine	Marine	COI	132	6	192	0.026	0.026	27	0.0256721	0.00347041	-3.66235	15	9	Collins et al.	2018	14	11-20	101-200	tank	organism	Collins, R. A., Wangensteen, O. S., O’Gorman, E. J., Mariani, S., Sims, D. W., & Genner, M. J. (2018). Persistence of environmental DNA in marine systems. Communications Biology, 1(1). doi: 10.1038/s42003-018-0192-6
Lipophrys pholis	fish	Marine	Marine	COI	132	6	192	0.026	0.026	27	0.0256721	0.00347041	-3.66235	15	9	Collins et al.	2018	14	11-20	101-200	tank	organism	Collins, R. A., Wangensteen, O. S., O’Gorman, E. J., Mariani, S., Sims, D. W., & Genner, M. J. (2018). Persistence of environmental DNA in marine systems. Communications Biology, 1(1). doi: 10.1038/s42003-018-0192-6
Lipophrys pholis	fish	Marine	Marine	COI	132	6	192	0.025	0.025	28	0.0247553	0.00347041	-3.69872	15	9	Collins et al.	2018	14	11-20	101-200	tank	organism	Collins, R. A., Wangensteen, O. S., O’Gorman, E. J., Mariani, S., Sims, D. W., & Genner, M. J. (2018). Persistence of environmental DNA in marine systems. Communications Biology, 1(1). doi: 10.1038/s42003-018-0192-6
Chionodraco rastrospinosus	fish	Marine	Marine	ND2	70	20	480	0.234	0.0098	71	0.00976264	0.00367444	-4.62919	-1		Cowart et al.	2018	15	-1	0-100	tank	spike	Cowart, D. A., Murphy, K. R., & Cheng, C.-H. C. (2018). Metagenomic sequencing of environmental DNA reveals marine faunal assemblages from the West Antarctic Peninsula. Marine Genomics, 37, 148–160. doi: 10.1016/j.margen.2017.11.003
Trachurus japonicus	fish	Marine	Marine	CytB	127	9	96	0.0372	0.0372	19	0.0364814	0.00349467	-3.31095	13		Jo et al.	2019	20	11-20	101-200	tank	organism	Jo, T., Murakami, H., Yamamoto, S., Masuda, R., & Minamoto, T. (2019). Effect of water temperature and fish biomass on environmental DNA shedding, degradation, and size distribution. Ecology and Evolution. doi: 10.1002/ece3.4802
Trachurus japonicus	fish	Marine	Marine	CytB	127	9	96	0.1154	0.1154	6	0.115525	0.00349467	-2.15827	13		Jo et al.	2019	20	11-20	101-200	tank	organism	Jo, T., Murakami, H., Yamamoto, S., Masuda, R., & Minamoto, T. (2019). Effect of water temperature and fish biomass on environmental DNA shedding, degradation, and size distribution. Ecology and Evolution. doi: 10.1002/ece3.4802
Trachurus japonicus	fish	Marine	Marine	CytB	127	9	96	0.211	0.211	3	0.231049	0.00349467	-1.46513	13		Jo et al.	2019	20	11-20	101-200	tank	organism	Jo, T., Murakami, H., Yamamoto, S., Masuda, R., & Minamoto, T. (2019). Effect of water temperature and fish biomass on environmental DNA shedding, degradation, and size distribution. Ecology and Evolution. doi: 10.1002/ece3.4802
Trachurus japonicus	fish	Marine	Marine	CytB	127	9	96	0.1219	0.1219	6	0.115525	0.00343466	-2.15827	18		Jo et al.	2019	20	11-20	101-200	tank	organism	Jo, T., Murakami, H., Yamamoto, S., Masuda, R., & Minamoto, T. (2019). Effect of water temperature and fish biomass on environmental DNA shedding, degradation, and size distribution. Ecology and Evolution. doi: 10.1002/ece3.4802
Trachurus japonicus	fish	Marine	Marine	CytB	127	9	96	0.2074	0.2074	3	0.231049	0.00343466	-1.46513	18		Jo et al.	2019	20	11-20	101-200	tank	organism	Jo, T., Murakami, H., Yamamoto, S., Masuda, R., & Minamoto, T. (2019). Effect of water temperature and fish biomass on environmental DNA shedding, degradation, and size distribution. Ecology and Evolution. doi: 10.1002/ece3.4802
Trachurus japonicus	fish	Marine	Marine	CytB	127	9	96	0.2969	0.2969	2	0.346574	0.00343466	-1.05966	18		Jo et al.	2019	20	11-20	101-200	tank	organism	Jo, T., Murakami, H., Yamamoto, S., Masuda, R., & Minamoto, T. (2019). Effect of water temperature and fish biomass on environmental DNA shedding, degradation, and size distribution. Ecology and Evolution. doi: 10.1002/ece3.4802
Trachurus japonicus	fish	Marine	Marine	CytB	127	9	96	0.2126	0.2126	3	0.231049	0.00337667	-1.46513	23		Jo et al.	2019	20	21-	101-200	tank	organism	Jo, T., Murakami, H., Yamamoto, S., Masuda, R., & Minamoto, T. (2019). Effect of water temperature and fish biomass on environmental DNA shedding, degradation, and size distribution. Ecology and Evolution. doi: 10.1002/ece3.4802
Trachurus japonicus	fish	Marine	Marine	CytB	127	9	96	0.2903	0.2903	2	0.346574	0.00337667	-1.05966	23		Jo et al.	2019	20	21-	101-200	tank	organism	Jo, T., Murakami, H., Yamamoto, S., Masuda, R., & Minamoto, T. (2019). Effect of water temperature and fish biomass on environmental DNA shedding, degradation, and size distribution. Ecology and Evolution. doi: 10.1002/ece3.4802
Trachurus japonicus	fish	Marine	Marine	CytB	127	9	96	0.3753	0.3753	2	0.346574	0.00337667	-1.05966	23		Jo et al.	2019	20	21-	101-200	tank	organism	Jo, T., Murakami, H., Yamamoto, S., Masuda, R., & Minamoto, T. (2019). Effect of water temperature and fish biomass on environmental DNA shedding, degradation, and size distribution. Ecology and Evolution. doi: 10.1002/ece3.4802
Trachurus japonicus	fish	Marine	Marine	CytB	127	9	96	0.2959	0.2959	2	0.346574	0.0033206	-1.05966	28		Jo et al.	2019	20	21-	101-200	tank	organism	Jo, T., Murakami, H., Yamamoto, S., Masuda, R., & Minamoto, T. (2019). Effect of water temperature and fish biomass on environmental DNA shedding, degradation, and size distribution. Ecology and Evolution. doi: 10.1002/ece3.4802
Trachurus japonicus	fish	Marine	Marine	CytB	127	9	96	0.3689	0.3689	2	0.346574	0.0033206	-1.05966	28		Jo et al.	2019	20	21-	101-200	tank	organism	Jo, T., Murakami, H., Yamamoto, S., Masuda, R., & Minamoto, T. (2019). Effect of water temperature and fish biomass on environmental DNA shedding, degradation, and size distribution. Ecology and Evolution. doi: 10.1002/ece3.4802
Trachurus japonicus	fish	Marine	Marine	CytB	127	9	96	0.4686	0.4686	1	0.693147	0.0033206	-0.366513	28		Jo et al.	2019	20	21-	101-200	tank	organism	Jo, T., Murakami, H., Yamamoto, S., Masuda, R., & Minamoto, T. (2019). Effect of water temperature and fish biomass on environmental DNA shedding, degradation, and size distribution. Ecology and Evolution. doi: 10.1002/ece3.4802
Trachurus japonicus	fish	Marine	Marine	CytB	127	9	96	0.0366	0.0366	19	0.0364814	0.00349467	-3.31095	13		Jo et al.	2019	24	11-20	101-200	tank	organism	Jo, T., Arimoto, M., Murakami, H., Masuda, R., & Minamoto, T. (2019). Estimating shedding and decay rates of environmental nuclear DNA with relation to water temperature and biomass. Environmental DNA, edn3.51. doi: 10.1002/edn3.51
Trachurus japonicus	fish	Marine	Marine	CytB	127	9	96	0.1151	0.1151	6	0.115525	0.00349467	-2.15827	13		Jo et al.	2019	24	11-20	101-200	tank	organism	Jo, T., Arimoto, M., Murakami, H., Masuda, R., & Minamoto, T. (2019). Estimating shedding and decay rates of environmental nuclear DNA with relation to water temperature and biomass. Environmental DNA, edn3.51. doi: 10.1002/edn3.51
Trachurus japonicus	fish	Marine	Marine	CytB	127	9	96	0.2109	0.2109	3	0.231049	0.00349467	-1.46513	13		Jo et al.	2019	24	11-20	101-200	tank	organism	Jo, T., Arimoto, M., Murakami, H., Masuda, R., & Minamoto, T. (2019). Estimating shedding and decay rates of environmental nuclear DNA with relation to water temperature and biomass. Environmental DNA, edn3.51. doi: 10.1002/edn3.51
Trachurus japonicus	fish	Marine	Marine	CytB	127	9	96	0.265	0.265	3	0.231049	0.00343466	-1.46513	18		Jo et al.	2019	24	11-20	101-200	tank	organism	Jo, T., Arimoto, M., Murakami, H., Masuda, R., & Minamoto, T. (2019). Estimating shedding and decay rates of environmental nuclear DNA with relation to water temperature and biomass. Environmental DNA, edn3.51. doi: 10.1002/edn3.51
Trachurus japonicus	fish	Marine	Marine	CytB	127	9	96	0.3559	0.3559	2	0.346574	0.00343466	-1.05966	18		Jo et al.	2019	24	11-20	101-200	tank	organism	Jo, T., Arimoto, M., Murakami, H., Masuda, R., & Minamoto, T. (2019). Estimating shedding and decay rates of environmental nuclear DNA with relation to water temperature and biomass. Environmental DNA, edn3.51. doi: 10.1002/edn3.51
Trachurus japonicus	fish	Marine	Marine	CytB	127	9	96	0.451	0.451	2	0.346574	0.00343466	-1.05966	18		Jo et al.	2019	24	11-20	101-200	tank	organism	Jo, T., Arimoto, M., Murakami, H., Masuda, R., & Minamoto, T. (2019). Estimating shedding and decay rates of environmental nuclear DNA with relation to water temperature and biomass. Environmental DNA, edn3.51. doi: 10.1002/edn3.51
Trachurus japonicus	fish	Marine	Marine	CytB	127	9	96	0.3932	0.3932	2	0.346574	0.00337667	-1.05966	23		Jo et al.	2019	24	21-	101-200	tank	organism	Jo, T., Arimoto, M., Murakami, H., Masuda, R., & Minamoto, T. (2019). Estimating shedding and decay rates of environmental nuclear DNA with relation to water temperature and biomass. Environmental DNA, edn3.51. doi: 10.1002/edn3.51
Trachurus japonicus	fish	Marine	Marine	CytB	127	9	96	0.4757	0.4757	1	0.693147	0.00337667	-0.366513	23		Jo et al.	2019	24	21-	101-200	tank	organism	Jo, T., Arimoto, M., Murakami, H., Masuda, R., & Minamoto, T. (2019). Estimating shedding and decay rates of environmental nuclear DNA with relation to water temperature and biomass. Environmental DNA, edn3.51. doi: 10.1002/edn3.51
Trachurus japonicus	fish	Marine	Marine	CytB	127	9	96	0.566	0.566	1	0.693147	0.00337667	-0.366513	23		Jo et al.	2019	24	21-	101-200	tank	organism	Jo, T., Arimoto, M., Murakami, H., Masuda, R., & Minamoto, T. (2019). Estimating shedding and decay rates of environmental nuclear DNA with relation to water temperature and biomass. Environmental DNA, edn3.51. doi: 10.1002/edn3.51
Trachurus japonicus	fish	Marine	Marine	CytB	127	9	96	0.5133	0.5133	1	0.693147	0.0033206	-0.366513	28		Jo et al.	2019	24	21-	101-200	tank	organism	Jo, T., Arimoto, M., Murakami, H., Masuda, R., & Minamoto, T. (2019). Estimating shedding and decay rates of environmental nuclear DNA with relation to water temperature and biomass. Environmental DNA, edn3.51. doi: 10.1002/edn3.51
Trachurus japonicus	fish	Marine	Marine	CytB	127	9	96	0.591	0.591	1	0.693147	0.0033206	-0.366513	28		Jo et al.	2019	24	21-	101-200	tank	organism	Jo, T., Arimoto, M., Murakami, H., Masuda, R., & Minamoto, T. (2019). Estimating shedding and decay rates of environmental nuclear DNA with relation to water temperature and biomass. Environmental DNA, edn3.51. doi: 10.1002/edn3.51
Trachurus japonicus	fish	Marine	Marine	CytB	127	9	96	0.6969	0.6969	1	0.693147	0.0033206	-0.366513	28		Jo et al.	2019	24	21-	101-200	tank	organism	Jo, T., Arimoto, M., Murakami, H., Masuda, R., & Minamoto, T. (2019). Estimating shedding and decay rates of environmental nuclear DNA with relation to water temperature and biomass. Environmental DNA, edn3.51. doi: 10.1002/edn3.51
Trachurus japonicus	fish	Marine	Marine	ITS	164	9	96	0.1432	0.1432	5	0.138629	0.00349467	-1.97595	13		Jo et al.	2019	24	11-20	101-200	tank	organism	Jo, T., Arimoto, M., Murakami, H., Masuda, R., & Minamoto, T. (2019). Estimating shedding and decay rates of environmental nuclear DNA with relation to water temperature and biomass. Environmental DNA, edn3.51. doi: 10.1002/edn3.51
Trachurus japonicus	fish	Marine	Marine	ITS	164	9	96	0.2264	0.2264	3	0.231049	0.00349467	-1.46513	13		Jo et al.	2019	24	11-20	101-200	tank	organism	Jo, T., Arimoto, M., Murakami, H., Masuda, R., & Minamoto, T. (2019). Estimating shedding and decay rates of environmental nuclear DNA with relation to water temperature and biomass. Environmental DNA, edn3.51. doi: 10.1002/edn3.51
Trachurus japonicus	fish	Marine	Marine	ITS	164	9	96	0.328	0.328	2	0.346574	0.00349467	-1.05966	13		Jo et al.	2019	24	11-20	101-200	tank	organism	Jo, T., Arimoto, M., Murakami, H., Masuda, R., & Minamoto, T. (2019). Estimating shedding and decay rates of environmental nuclear DNA with relation to water temperature and biomass. Environmental DNA, edn3.51. doi: 10.1002/edn3.51
Trachurus japonicus	fish	Marine	Marine	ITS	164	9	96	0.265	0.265	3	0.231049	0.00343466	-1.46513	18		Jo et al.	2019	24	11-20	101-200	tank	organism	Jo, T., Arimoto, M., Murakami, H., Masuda, R., & Minamoto, T. (2019). Estimating shedding and decay rates of environmental nuclear DNA with relation to water temperature and biomass. Environmental DNA, edn3.51. doi: 10.1002/edn3.51
Trachurus japonicus	fish	Marine	Marine	ITS	164	9	96	0.3559	0.3559	2	0.346574	0.00343466	-1.05966	18		Jo et al.	2019	24	11-20	101-200	tank	organism	Jo, T., Arimoto, M., Murakami, H., Masuda, R., & Minamoto, T. (2019). Estimating shedding and decay rates of environmental nuclear DNA with relation to water temperature and biomass. Environmental DNA, edn3.51. doi: 10.1002/edn3.51
Trachurus japonicus	fish	Marine	Marine	ITS	164	9	96	0.451	0.451	2	0.346574	0.00343466	-1.05966	18		Jo et al.	2019	24	11-20	101-200	tank	organism	Jo, T., Arimoto, M., Murakami, H., Masuda, R., & Minamoto, T. (2019). Estimating shedding and decay rates of environmental nuclear DNA with relation to water temperature and biomass. Environmental DNA, edn3.51. doi: 10.1002/edn3.51
Trachurus japonicus	fish	Marine	Marine	ITS	164	9	96	0.3932	0.3932	2	0.346574	0.00337667	-1.05966	23		Jo et al.	2019	24	21-	101-200	tank	organism	Jo, T., Arimoto, M., Murakami, H., Masuda, R., & Minamoto, T. (2019). Estimating shedding and decay rates of environmental nuclear DNA with relation to water temperature and biomass. Environmental DNA, edn3.51. doi: 10.1002/edn3.51
Trachurus japonicus	fish	Marine	Marine	ITS	164	9	96	0.4757	0.4757	1	0.693147	0.00337667	-0.366513	23		Jo et al.	2019	24	21-	101-200	tank	organism	Jo, T., Arimoto, M., Murakami, H., Masuda, R., & Minamoto, T. (2019). Estimating shedding and decay rates of environmental nuclear DNA with relation to water temperature and biomass. Environmental DNA, edn3.51. doi: 10.1002/edn3.51
Trachurus japonicus	fish	Marine	Marine	ITS	164	9	96	0.466	0.466	1	0.693147	0.00337667	-0.366513	23		Jo et al.	2019	24	21-	101-200	tank	organism	Jo, T., Arimoto, M., Murakami, H., Masuda, R., & Minamoto, T. (2019). Estimating shedding and decay rates of environmental nuclear DNA with relation to water temperature and biomass. Environmental DNA, edn3.51. doi: 10.1002/edn3.51
Trachurus japonicus	fish	Marine	Marine	ITS	164	9	96	0.5133	0.5133	1	0.693147	0.0033206	-0.366513	28		Jo et al.	2019	24	21-	101-200	tank	organism	Jo, T., Arimoto, M., Murakami, H., Masuda, R., & Minamoto, T. (2019). Estimating shedding and decay rates of environmental nuclear DNA with relation to water temperature and biomass. Environmental DNA, edn3.51. doi: 10.1002/edn3.51
Trachurus japonicus	fish	Marine	Marine	ITS	164	9	96	0.591	0.591	1	0.693147	0.0033206	-0.366513	28		Jo et al.	2019	24	21-	101-200	tank	organism	Jo, T., Arimoto, M., Murakami, H., Masuda, R., & Minamoto, T. (2019). Estimating shedding and decay rates of environmental nuclear DNA with relation to water temperature and biomass. Environmental DNA, edn3.51. doi: 10.1002/edn3.51
Trachurus japonicus	fish	Marine	Marine	ITS	164	9	96	0.6969	0.6969	1	0.693147	0.0033206	-0.366513	28		Jo et al.	2019	24	21-	101-200	tank	organism	Jo, T., Arimoto, M., Murakami, H., Masuda, R., & Minamoto, T. (2019). Estimating shedding and decay rates of environmental nuclear DNA with relation to water temperature and biomass. Environmental DNA, edn3.51. doi: 10.1002/edn3.51
Centropristis striata	fish	Marine	Marine	COI	116					3.71	0.19	0.00341285	-1.66073	19.86	7.88	Kirtane et al	2021				mesocosm	organism	Kirtane, A., Wieczorek, D., Noji, T., Baskin, L., Ober, C., Plosica, R., … Sassoubre, L. (2021). Quantification of Environmental DNA (eDNA) shedding and decay rates for three commercially harvested fish species and comparison between eDNA detection and trawl catches. Environmental DNA, edn3.236. doi: 10.1002/edn3.236
Pseudopleuronectes americanus	fish	Marine	Marine	COI	135					2.77	0.25	0.00341285	-1.38629	19.86	7.88	Kirtane et al	2021				mesocosm	organism	Kirtane, A., Wieczorek, D., Noji, T., Baskin, L., Ober, C., Plosica, R., … Sassoubre, L. (2021). Quantification of Environmental DNA (eDNA) shedding and decay rates for three commercially harvested fish species and comparison between eDNA detection and trawl catches. Environmental DNA, edn3.236. doi: 10.1002/edn3.236
Pseudopleuronectes americanus	fish	Marine	Marine	COI	292					2.82	0.25	0.00341285	-1.38629	19.86	7.88	Kirtane et al	2021				mesocosm	organism	Kirtane, A., Wieczorek, D., Noji, T., Baskin, L., Ober, C., Plosica, R., … Sassoubre, L. (2021). Quantification of Environmental DNA (eDNA) shedding and decay rates for three commercially harvested fish species and comparison between eDNA detection and trawl catches. Environmental DNA, edn3.236. doi: 10.1002/edn3.236
Paralichthys dentatus	fish	Marine	Marine	COI	103					9.9	0.07	0.0034559	-2.65926	16.21	8.04	Kirtane et al	2021				mesocosm	organism	Kirtane, A., Wieczorek, D., Noji, T., Baskin, L., Ober, C., Plosica, R., … Sassoubre, L. (2021). Quantification of Environmental DNA (eDNA) shedding and decay rates for three commercially harvested fish species and comparison between eDNA detection and trawl catches. Environmental DNA, edn3.236. doi: 10.1002/edn3.236
Centropristis striata	fish	Marine	Marine	COI	116					4	0.17	0.0034222	-1.77196	19.06	7.93	Kirtane et al	2021				mesocosm	organism	Kirtane, A., Wieczorek, D., Noji, T., Baskin, L., Ober, C., Plosica, R., … Sassoubre, L. (2021). Quantification of Environmental DNA (eDNA) shedding and decay rates for three commercially harvested fish species and comparison between eDNA detection and trawl catches. Environmental DNA, edn3.236. doi: 10.1002/edn3.236
Pseudopleuronectes americanus	fish	Marine	Marine	COI	135					1.22	0.57	0.0034222	-0.562119	19.06	7.93	Kirtane et al	2021				mesocosm	organism	Kirtane, A., Wieczorek, D., Noji, T., Baskin, L., Ober, C., Plosica, R., … Sassoubre, L. (2021). Quantification of Environmental DNA (eDNA) shedding and decay rates for three commercially harvested fish species and comparison between eDNA detection and trawl catches. Environmental DNA, edn3.236. doi: 10.1002/edn3.236
Pseudopleuronectes americanus	fish	Marine	Marine	COI	292					3.21	0.22	0.0034222	-1.51413	19.06	7.93	Kirtane et al	2021				mesocosm	organism	Kirtane, A., Wieczorek, D., Noji, T., Baskin, L., Ober, C., Plosica, R., … Sassoubre, L. (2021). Quantification of Environmental DNA (eDNA) shedding and decay rates for three commercially harvested fish species and comparison between eDNA detection and trawl catches. Environmental DNA, edn3.236. doi: 10.1002/edn3.236
Paralichthys dentatus	fish	Marine	Marine	COI	103					2.89	0.24	0.00345997	-1.42712	15.87	7.88	Kirtane et al	2021				mesocosm	organism	Kirtane, A., Wieczorek, D., Noji, T., Baskin, L., Ober, C., Plosica, R., … Sassoubre, L. (2021). Quantification of Environmental DNA (eDNA) shedding and decay rates for three commercially harvested fish species and comparison between eDNA detection and trawl catches. Environmental DNA, edn3.236. doi: 10.1002/edn3.236
